# Supplementary material for: Carcinogenic effects of long-term exposure from prenatal life to glyphosate and glyphosate-based herbicides in Sprague–Dawley rats
Source: Springer Nature journal article supplement (doi:10.1186/s12940-025-01187-2), 2025-06-09
Supplement: MOESM1 [file 12940_2025_1187_MOESM1_ESM.pdf]

SUPPLEMENTARY TABLE 1: INCIDENCE RATES OF NEOPLASMS BY ANATOMIC SITE IN MALE SD RATS

| Site                              | Histotype                                   | Dose Groups <sup>a</sup> |       |          |                               |       |         |                             |       |         |                              |       |         |                                    |       |         |                                  |       |         |                                   |       |         |                              |       |         |                            |       |         |                             |       |         |      |      |  |
|-----------------------------------|---------------------------------------------|--------------------------|-------|----------|-------------------------------|-------|---------|-----------------------------|-------|---------|------------------------------|-------|---------|------------------------------------|-------|---------|----------------------------------|-------|---------|-----------------------------------|-------|---------|------------------------------|-------|---------|----------------------------|-------|---------|-----------------------------|-------|---------|------|------|--|
|                                   |                                             | 0 (control)              |       |          | Glyphosate (0.5 mg/kg bw/day) |       |         | Glyphosate (5 mg/kg bw/day) |       |         | Glyphosate (50 mg/kg bw/day) |       |         | Roundup Bioflow (0.5 mg/kg bw/day) |       |         | Roundup Bioflow (5 mg/kg bw/day) |       |         | Roundup Bioflow (50 mg/kg bw/day) |       |         | RangerPro (0.5 mg/kg bw/day) |       |         | RangerPro (5 mg/kg bw/day) |       |         | RangerPro (50 mg/kg bw/day) |       |         |      |      |  |
|                                   |                                             | No.                      | %     | P-value  | No.                           | %     | P-value | No.                         | %     | P-value | No.                          | %     | P-value | No.                                | %     | P-value | No.                              | %     | P-value | No.                               | %     | P-value | No.                          | %     | P-value | No.                        | %     | P-value | No.                         | %     | P-value |      |      |  |
| Skin                              | Squamous cell papilloma (Acanthoma)         | 0                        | -     | * 0.0392 | 0                             | -     |         | 1                           | 1.96  |         | 2                            | 3.92  |         | 1                                  | 1.96  |         | 1                                | 1.96  |         | 0                                 | -     |         | 1                            | 1.96  |         | 0                          | -     |         | 0                           | -     |         | 0    | -    |  |
|                                   | Keratoacanthoma                             | 0                        | -     | * 0.0419 | 0                             | -     |         | 0                           | -     |         | 1                            | 1.96  |         | 0                                  | -     |         | 1                                | 1.96  |         | 0                                 | -     |         | 0                            | -     |         | 0                          | -     |         | 0                           | -     |         | 1    | 1.96 |  |
|                                   |                                             |                          |       | § 0.0419 |                               |       |         |                             |       |         |                              |       |         |                                    |       |         |                                  |       |         |                                   |       |         |                              |       |         |                            |       |         |                             |       |         |      |      |  |
|                                   | Benign Trichoepithelioma                    | 0                        | -     |          | 0                             | -     |         | 0                           | -     |         | 0                            | 0.0   |         | 0                                  | -     |         | 0                                | -     |         | 0                                 | -     |         | 1                            | 1.96  |         | 0                          | -     |         | 0                           | -     |         | 0    | -    |  |
|                                   | Squamous cell carcinoma                     | 0                        | -     |          | 1                             | 1.96  |         | 0                           | -     |         | 1                            | 1.96  |         | 0                                  | -     |         | 1                                | 1.96  |         | 0                                 | -     |         | 0                            | -     |         | 0                          | -     |         | 0                           | -     |         | 0    | -    |  |
|                                   | Basal cell carcinoma                        | 0                        | -     | # 0.0419 | 0                             | -     |         | 0                           | -     |         | 0                            | -     |         | 0                                  | -     |         | 0                                | -     |         | 1                                 | 1.96  |         | 0                            | -     |         | 0                          | -     |         | 0                           | -     |         | 0    | -    |  |
|                                   | Sebaceous carcinoma                         | 0                        | -     |          | 1                             | 1.96  |         | 0                           | -     |         | 0                            | -     |         | 0                                  | -     |         | 0                                | -     |         | 0                                 | -     |         | 0                            | -     |         | 0                          | -     |         | 0                           | -     |         | 0    | -    |  |
|                                   | Subcutaneous tissue, Fibroma                | 2                        | 3.92  |          | 2                             | 3.92  |         | 2 (3)                       | 3.92  |         | 1                            | 1.96  |         | 2                                  | 3.92  |         | 3                                | 5.88  |         | 2                                 | 3.92  |         | 2                            | 3.92  |         | 1                          | 1.96  |         | 1                           | 1.96  |         | 3    | 5.88 |  |
|                                   | Subcutaneous tissue, Lipoma and fibrolipoma | 0                        | -     |          | 1                             | 1.96  |         | 3                           | 5.88  |         | 0                            | -     |         | 1                                  | 1.96  |         | 1                                | 1.96  |         | 2(3)                              | 3.92  |         | 3(5)                         | 5.88  |         | 2                          | 3.92  |         | 2                           | 3.92  |         | 0    | -    |  |
| Subcutaneous tissue, Fibrosarcoma | 2                                           | 3.92                     |       | 1        | 1.96                          |       | 0       | -                           |       | 0       | -                            |       | 0       | -                                  |       | 0       | -                                |       | 0       | -                                 |       | 0       | -                            |       | 0       | -                          |       | 1       | 1.96                        |       | 0       | -    |      |  |
| Mammary glands                    | Adenoma, fibroma and fibroadenoma           | 0                        | -     | * 0.0419 | 0                             | -     |         | 0                           | -     |         | 1                            | 1.96  |         | 0                                  | -     |         | 0                                | -     |         | 1                                 | 1.96  |         | 1                            | 1.96  |         | 1                          | 1.96  |         | 1                           | 1.96  |         | 1    | 1.96 |  |
|                                   | Lipoma and fibrolipoma                      | 0                        | -     | * 0.0419 | 0                             | -     |         | 0                           | -     |         | 1                            | 1.96  |         | 0                                  | -     |         | 0                                | -     |         | 1                                 | 1.96  |         | 0                            | -     |         | 0                          | -     |         | 0                           | -     |         | 0    | -    |  |
|                                   |                                             |                          |       | # 0.0419 |                               |       |         |                             |       |         |                              |       |         |                                    |       |         |                                  |       |         |                                   |       |         |                              |       |         |                            |       |         |                             |       |         |      |      |  |
| Adenocarcinoma                    | 0                                           | -                        |       | 0        | -                             |       | 0       | -                           |       | 0       | -                            |       | 0       | -                                  |       | 0       | -                                |       | 0       | -                                 |       | 2       | 3.92                         |       | 0       | -                          |       | 0       | -                           |       | 1       | 1.96 |      |  |
| Zymbal glands                     | Carcinoma (sebaceous or squamous)           | 1                        | 1.96  |          | 0                             | -     |         | 0                           | -     |         | 0                            | -     |         | 0                                  | -     |         | 0                                | -     |         | 0                                 | -     |         | 1                            | 1.96  |         | 0                          | -     |         | 0                           | -     |         | 0    | -    |  |
| Harderian gland                   | Carcinoma                                   | 0                        | -     |          | 1                             | 1.96  |         | 0                           | -     |         | 0                            | -     |         | 0                                  | -     |         | 0                                | -     |         | 0                                 | -     |         | 0                            | -     |         | 0                          | -     |         | 0                           | -     |         | 0    | -    |  |
| Lung                              | Adenoma                                     | 0                        | -     |          | 1                             | 1.96  |         | 0                           | -     |         | 0                            | -     |         | 0                                  | -     |         | 0                                | -     |         | 0                                 | -     |         | 0                            | -     |         | 0                          | -     |         | 0                           | -     |         | 0    | -    |  |
|                                   | Squamous cell Papilloma (Acanthoma)         | 0                        | -     | * 0.0419 | 0                             | -     |         | 0                           | -     |         | 1                            | 1.96  |         | 0                                  | -     |         | 0                                | -     |         | 0                                 | -     |         | 0                            | -     |         | 0                          | -     |         | 0                           | -     |         | 0    | -    |  |
|                                   | Fibroma                                     | 0                        | -     | # 0.0419 | 0                             | -     |         | 0                           | -     |         | 0                            | -     |         | 0                                  | -     |         | 0                                | -     |         | 1                                 | 1.96  |         | 0                            | -     |         | 0                          | -     |         | 0                           | -     |         | 0    | -    |  |
|                                   | Osteoma                                     | 0                        | -     | * 0.0419 | 0                             | -     |         | 0                           | -     |         | 1                            | 1.96  |         | 0                                  | -     |         | 0                                | -     |         | 0                                 | -     |         | 0                            | -     |         | 0                          | -     |         | 0                           | -     |         | 0    | -    |  |
|                                   |                                             |                          |       |          |                               |       |         |                             |       |         |                              |       |         |                                    |       |         |                                  |       |         |                                   |       |         |                              |       |         |                            |       |         |                             |       |         |      |      |  |
| Salivary gland                    | Adenocarcinoma                              | 0                        | -     |          | 0                             | -     |         | 0                           | -     |         | 0                            | -     |         | 0                                  | -     |         | 0                                | -     |         | 0                                 | -     |         | 1                            | 1.96  |         | 0                          | -     |         | 0                           | -     |         |      |      |  |
| Stomach                           | - Forestomach                               |                          |       |          |                               |       |         |                             |       |         |                              |       |         |                                    |       |         |                                  |       |         |                                   |       |         |                              |       |         |                            |       |         |                             |       |         |      |      |  |
|                                   | Squamous cell Papilloma (Acanthoma)         | 1                        | 1.96  |          | 2                             | 3.92  |         | 0                           | -     |         | 2                            | 3.92  |         | 0                                  | -     |         | 0                                | -     |         | 0                                 | -     |         | 0                            | -     |         | 0                          | -     |         | 0                           | -     |         |      |      |  |
| - Glandular stomach               | Polyp, adenomatous                          | 0                        | -     |          | 0                             | -     |         | 0                           | -     |         | 0                            | -     |         | 1                                  | 1.96  |         | 0                                | -     |         | 0                                 | -     |         | 0                            | -     |         | 0                          | -     |         | 0                           | -     |         | 0    | -    |  |
| Intestine                         | Polyp, adenomatous                          | 0                        | -     |          | 1                             | 1.96  |         | 0                           | -     |         | 0                            | -     |         | 1                                  | 1.96  |         | 0                                | -     |         | 1                                 | 1.96  |         | 0                            | -     |         | 0                          | -     |         | 0                           | -     |         | 0    | -    |  |
|                                   | Leiomyoma                                   | 0                        | -     |          | 0                             | -     |         | 0                           | -     |         | 0                            | -     |         | 1                                  | 1.96  |         | 0                                | -     |         | 0                                 | -     |         | 0                            | -     |         | 0                          | -     |         | 0                           | -     |         |      |      |  |
| Liver                             | Hepatocellular adenoma                      | 0                        | -     |          | 1                             | 1.96  |         | 1                           | 1.96  |         | 0                            | -     |         | 0                                  | -     |         | 0                                | -     |         | 0                                 | -     |         | 0                            | -     |         | 0                          | -     |         | 0                           | -     |         |      |      |  |
|                                   | Hepatocellular carcinoma                    | 1                        | 1.96  |          | 2                             | 3.92  |         | 1                           | 1.96  |         | 2                            | 3.92  |         | 1                                  | 1.96  |         | 0                                | -     |         | 0                                 | -     |         | 2                            | 3.92  |         | 0                          | -     |         |                             |       |         |      |      |  |
| Pancreas                          | Exocrine adenoma                            | 0                        | -     |          | 0                             | -     |         | 1                           | 1.96  |         | 0                            | -     |         | 0                                  | -     |         | 0                                | -     |         | 0                                 | -     |         | 0                            | -     |         | 0                          | -     |         | 0                           | -     |         |      |      |  |
|                                   | Exocrine carcinoma                          | 1                        | 1.96  |          | 0                             | -     |         | 1                           | 1.96  |         | 0                            | -     |         | 0                                  | -     |         | 0                                | -     |         | 0                                 | -     |         | 0                            | -     |         | 0                          | -     |         | 0                           | -     |         |      |      |  |
| Kidneys                           | Tubular cell carcinoma                      | 0                        | -     |          | 0                             | -     |         | 0                           | -     |         | 0                            | -     |         | 0                                  | -     |         | 0                                | -     |         | 0                                 | -     |         | 1 (2)                        | 1.96  |         | 0                          | -     |         | 0                           | -     |         | 1    | 1.96 |  |
|                                   | Malignant mesenchymal tumor                 | 0                        | -     | # 0.0419 | 0                             | -     |         | 0                           | -     |         | 0                            | -     |         | 0                                  | -     |         | 0                                | -     |         | 1                                 | 1.96  |         | 0                            | -     |         | 0                          | -     |         | 0                           | -     |         |      |      |  |
| Pelvis                            | Papilloma, transitional cell                | 1                        | 1.96  |          | 0                             | -     |         | 0                           | -     |         | 0                            | -     |         | 0                                  | -     |         | 0                                | -     |         | 0                                 | -     |         | 0                            | -     |         | 0                          | -     |         | 0                           | -     |         |      |      |  |
|                                   | Carcinoma transitional cell                 | 0                        | -     |          | 0                             | -     |         | 0                           | -     |         | 0                            | -     |         | 0                                  | -     |         | 0                                | -     |         | 0                                 | -     |         | 0                            | -     |         | 1                          | 1.96  |         | 0                           | -     |         |      |      |  |
| Bladder                           | Papilloma, transitional cell                | 0                        | -     |          | 0                             | -     |         | 0                           | -     |         | 0                            | -     |         | 0                                  | -     |         | 0                                | -     |         | 0                                 | -     |         | 1                            | 1.96  |         | 0                          | -     |         | 0                           | -     |         |      |      |  |
|                                   | Carcinoma, transitional cell                | 0                        | -     | # 0.0419 | 0                             | -     |         | 0                           | -     |         | 0                            | -     |         | 0                                  | -     |         | 0                                | -     |         | 1                                 | 1.96  |         | 0                            | -     |         | 0                          | -     |         |                             |       |         |      |      |  |
| Testes                            | Interstitial cell adenoma                   | 1                        | 1.96  |          | 0                             | -     |         | 0                           | -     |         | 1                            | 1.96  |         | 1                                  | 1.96  |         | 1                                | 1.96  |         | 1                                 | 1.96  |         | 1                            | 1.96  |         | 0                          | -     |         | 0                           | -     |         |      |      |  |
| Pituitary gland                   | Adenoma                                     | 18                       | 35.29 |          | 18                            | 35.29 |         | 16                          | 31.37 |         | 16                           | 31.37 |         | 20                                 | 39.22 |         | 16                               | 31.37 |         | 18                                | 35.29 |         | 15                           | 29.41 |         | 18                         | 35.29 |         | 19                          | 37.25 |         |      |      |  |
|                                   | Adenocarcinoma                              | 1                        | 1.96  |          | 1                             | 1.96  |         | 1                           | 1.96  |         | 2                            | 3.92  |         | 2                                  | 3.92  |         | 1                                | 1.96  |         | 0                                 | -     |         | 1                            | 1.96  |         | 1                          | 1.96  |         | 1                           | 1.96  |         |      |      |  |
| Thyroid gland                     | Follicular adenoma                          | 0                        | -     |          | 0                             | -     |         | 0                           | -     |         | 0                            | -     |         | 0                                  | -     |         | 0                                | -     |         | 0                                 | -     |         | 0                            | -     |         | 0                          | -     |         | 0                           | -     |         |      |      |  |

SUPPLEMENTARY TABLE 1: INCIDENCE RATES OF NEOPLASMS BY ANATOMIC SITE IN MALE SD RATS

| Site                         | Histotype                               | Dose Groups <sup>a</sup> |       |          |                               |       |         |                             |       |         |                              |       |         |                                    |      |         |                                  |      |         |                                   |       |         |                              |       |         |                            |       |         |                             |       |         |
|------------------------------|-----------------------------------------|--------------------------|-------|----------|-------------------------------|-------|---------|-----------------------------|-------|---------|------------------------------|-------|---------|------------------------------------|------|---------|----------------------------------|------|---------|-----------------------------------|-------|---------|------------------------------|-------|---------|----------------------------|-------|---------|-----------------------------|-------|---------|
|                              |                                         | 0 (control)              |       |          | Glyphosate (0.5 mg/kg bw/day) |       |         | Glyphosate (5 mg/kg bw/day) |       |         | Glyphosate (50 mg/kg bw/day) |       |         | Roundup Bioflow (0.5 mg/kg bw/day) |      |         | Roundup Bioflow (5 mg/kg bw/day) |      |         | Roundup Bioflow (50 mg/kg bw/day) |       |         | RangerPro (0.5 mg/kg bw/day) |       |         | RangerPro (5 mg/kg bw/day) |       |         | RangerPro (50 mg/kg bw/day) |       |         |
|                              |                                         | No.                      | %     | P-value  | No.                           | %     | P-value | No.                         | %     | P-value | No.                          | %     | P-value | No.                                | %    | P-value | No.                              | %    | P-value | No.                               | %     | P-value | No.                          | %     | P-value | No.                        | %     | P-value | No.                         | %     | P-value |
|                              | C-cell adenoma                          | 2                        | 3.92  |          | 2                             | 3.92  |         | 1                           | 1.96  |         | 0                            | -     |         | 3                                  | 5.88 |         | 1                                | 1.96 |         | 1                                 | 1.96  |         | 3                            | 5.88  |         | 2                          | 3.92  |         | 3                           | 5.88  |         |
|                              | Follicular adenocarcinoma               | 0                        | -     | * 0.0419 | 0                             | -     |         | 0                           | -     |         | 1                            | 1.96  |         | 0                                  | -    |         | 0                                | -    |         | 0                                 | -     |         | 0                            | -     |         | 0                          | -     |         | 0                           | -     |         |
|                              | C-cell carcinoma                        | 1                        | 1.96  |          | 0                             | -     |         | 0                           | -     |         | 0                            | -     |         | 1                                  | 1.96 |         | 0                                | -    |         | 0                                 | -     |         | 0                            | -     |         | 0                          | -     |         | 0                           | -     |         |
| Adrenal glands               |                                         |                          |       |          |                               |       |         |                             |       |         |                              |       |         |                                    |      |         |                                  |      |         |                                   |       |         |                              |       |         |                            |       |         |                             |       |         |
|                              | Cortical adenoma                        | 0                        | -     |          | 0                             | -     |         | 0                           | -     |         | 0                            | -     |         | 1                                  | 1.96 |         | 0                                | -    |         | 0                                 | -     |         | 2                            | 3.92  |         | 0                          | -     |         | 0                           | -     |         |
|                              | Pheochromocytoma                        | 10(12)                   | 19.61 |          | 5                             | 9.80  |         | 4                           | 7.84  |         | 4(6)                         | 7.84  |         | 5(6)                               | 9.80 |         | 4(6)                             | 7.84 |         | 6                                 | 11.76 |         | 4(6)                         | 7.84  |         | 4(5)                       | 7.80  |         | 9(10)                       | 17.65 |         |
|                              | Cortical adenocarcinoma                 | 0                        | -     | § 0.0071 | 0                             | -     |         | 0                           | -     |         | 0                            | -     |         | 0                                  | -    |         | 1                                | 1.96 |         | 0                                 | -     |         | 0                            | -     |         | 0                          | -     |         | 2                           | 3.92  |         |
|                              | Pheochromoblastoma                      | 0                        | -     |          | 0                             | -     |         | 1                           | 1.96  |         | 0                            | -     |         | 0                                  | -    |         | 0                                | -    |         | 0                                 | -     |         | 0                            | -     |         | 1                          | 1.96  |         | 0                           | -     |         |
| Endocrine Pancreas           |                                         |                          |       |          |                               |       |         |                             |       |         |                              |       |         |                                    |      |         |                                  |      |         |                                   |       |         |                              |       |         |                            |       |         |                             |       |         |
|                              | Islet cell adenoma                      | 1                        | 1.96  |          | 5                             | 5.88  |         | 3                           | 5.88  |         | 1                            | 1.96  |         | 1                                  | 1.96 |         | 2                                | 3.92 |         | 2                                 | 3.92  |         | 2                            | 3.92  |         | 5                          | 9.8   |         | 1                           | 1.96  |         |
|                              | Islet cell carcinoma                    | 0                        | -     | § 0.0419 | 0                             | -     |         | 0                           | -     |         | 0                            | -     |         | 0                                  | -    |         | 0                                | -    |         | 0                                 | -     |         | 0                            | -     |         | 0                          | -     |         | 1                           | 1.96  |         |
| Central nervous system       |                                         |                          |       |          |                               |       |         |                             |       |         |                              |       |         |                                    |      |         |                                  |      |         |                                   |       |         |                              |       |         |                            |       |         |                             |       |         |
| - Brain                      |                                         |                          |       |          |                               |       |         |                             |       |         |                              |       |         |                                    |      |         |                                  |      |         |                                   |       |         |                              |       |         |                            |       |         |                             |       |         |
|                              | Oligodendroglioma malignant             | 0                        | -     |          | 1                             | 1.96  |         | 0                           | -     |         | 0                            | -     |         | 0                                  | -    |         | 0                                | -    |         | 0                                 | -     |         | 0                            | -     |         | 0                          | -     |         | 0                           | -     |         |
|                              | Astrocytoma malignant                   | 1                        | 1.96  |          | 0                             | -     |         | 0                           | -     |         | 0                            | -     |         | 1                                  | 1.96 |         | 0                                | -    |         | 0                                 | -     |         | 1                            | 1.96  |         | 0                          | -     |         | 1                           | 1.96  |         |
| - Meninges                   |                                         |                          |       |          |                               |       |         |                             |       |         |                              |       |         |                                    |      |         |                                  |      |         |                                   |       |         |                              |       |         |                            |       |         |                             |       |         |
|                              | Benign granular cell tumour             | 0                        | -     |          | 1                             | 1.96  |         | 0                           | -     |         | 0                            | -     |         | 0                                  | -    |         | 0                                | -    |         | 0                                 | -     |         | 0                            | -     |         | 0                          | -     |         | 0                           | -     |         |
|                              | Benign meningioma                       | 0                        | -     |          | 0                             | -     |         | 0                           | -     |         | 0                            | -     |         | 0                                  | -    |         | 0                                | -    |         | 0                                 | -     |         | 1                            | 1.96  |         | 0                          | -     |         | 0                           | -     |         |
|                              | Malignant granular cell tumor           | 0                        | -     | * 0.0071 | 0                             | -     |         | 0                           | -     |         | 2                            | 3.92  |         | 0                                  | -    |         | 0                                | -    |         | 0                                 | -     |         | 0                            | -     |         | 1                          | 1.96  |         | 0                           | -     |         |
| Peripheral nervous system    |                                         |                          |       |          |                               |       |         |                             |       |         |                              |       |         |                                    |      |         |                                  |      |         |                                   |       |         |                              |       |         |                            |       |         |                             |       |         |
| - Others peripheral nerves   |                                         |                          |       |          |                               |       |         |                             |       |         |                              |       |         |                                    |      |         |                                  |      |         |                                   |       |         |                              |       |         |                            |       |         |                             |       |         |
|                              | Malignant schwannoma                    | 0                        | -     | # 0.0071 | 0                             | -     |         | 2                           | 3.92  |         | 0                            | -     |         | 0                                  | -    |         | 0                                | -    |         | 2                                 | 3.92  |         | 0                            | -     |         | 0                          | -     |         | 0                           | -     |         |
| Bones                        |                                         |                          |       |          |                               |       |         |                             |       |         |                              |       |         |                                    |      |         |                                  |      |         |                                   |       |         |                              |       |         |                            |       |         |                             |       |         |
| - Head                       |                                         |                          |       |          |                               |       |         |                             |       |         |                              |       |         |                                    |      |         |                                  |      |         |                                   |       |         |                              |       |         |                            |       |         |                             |       |         |
|                              | Condroma                                | 0                        | -     | * 0.0419 | 0                             | -     |         | 0                           | -     |         | 1                            | 1.96  |         | 0                                  | -    |         | 0                                | -    |         | 0                                 | -     |         | 0                            | -     |         | 0                          | -     |         | 0                           | -     |         |
|                              | Osteoma                                 | 0                        | -     | * 0.0419 | 0                             | -     |         | 0                           | -     |         | 1                            | 1.96  |         | 0                                  | -    |         | 0                                | -    |         | 0                                 | -     |         | 0                            | -     |         | 0                          | -     |         | 1                           | 1.96  |         |
|                              | Osteosarcoma                            | 0                        | -     | § 0.0419 | 0                             | -     |         | 0                           | -     |         | 0                            | -     |         | 0                                  | -    |         | 0                                | -    |         | 0                                 | -     |         | 1                            | 1.96  |         | 2                          | 3.92  |         | 0                           | -     |         |
| - Other                      |                                         |                          |       |          |                               |       |         |                             |       |         |                              |       |         |                                    |      |         |                                  |      |         |                                   |       |         |                              |       |         |                            |       |         |                             |       |         |
|                              | Osteosarcoma                            | 0                        | -     |          | 1                             | 1.96  |         | 1                           | 1.96  |         | 0                            | -     |         | 0                                  | -    |         | 0                                | -    |         | 0                                 | -     |         | 0                            | -     |         | 0                          | -     |         | 0                           | -     |         |
| Soft tissues                 |                                         |                          |       |          |                               |       |         |                             |       |         |                              |       |         |                                    |      |         |                                  |      |         |                                   |       |         |                              |       |         |                            |       |         |                             |       |         |
|                              | Fibroma                                 | 0                        | -     | § 0.0419 | 0                             | -     |         | 0                           | -     |         | 0                            | -     |         | 0                                  | -    |         | 0                                | -    |         | 0                                 | -     |         | 0                            | -     |         | 0                          | -     |         | 1                           | 1.96  |         |
|                              | Lipoma                                  | 0                        | -     |          | 0                             | -     |         | 0                           | -     |         | 0                            | -     |         | 1                                  | 1.96 |         | 0                                | -    |         | 0                                 | -     |         | 0                            | -     |         | 0                          | -     |         | 0                           | -     |         |
| Skeletal muscle              |                                         |                          |       |          |                               |       |         |                             |       |         |                              |       |         |                                    |      |         |                                  |      |         |                                   |       |         |                              |       |         |                            |       |         |                             |       |         |
|                              | Rhabdomyosarcoma                        | 0                        | -     |          | 0                             | -     |         | 0                           | -     |         | 0                            | -     |         | 0                                  | -    |         | 1                                | 1.96 |         | 0                                 | -     |         | 0                            | -     |         | 0                          | -     |         | 0                           | -     |         |
| Heart                        |                                         |                          |       |          |                               |       |         |                             |       |         |                              |       |         |                                    |      |         |                                  |      |         |                                   |       |         |                              |       |         |                            |       |         |                             |       |         |
|                              | Malignant Schwannoma                    | 0                        | -     |          | 1                             | 1.96  |         | 0                           | -     |         | 0                            | -     |         | 0                                  | -    |         | 0                                | -    |         | 0                                 | -     |         | 1                            | 1.96  |         | 0                          | -     |         | 0                           | -     |         |
| Spleen                       |                                         |                          |       |          |                               |       |         |                             |       |         |                              |       |         |                                    |      |         |                                  |      |         |                                   |       |         |                              |       |         |                            |       |         |                             |       |         |
|                              | Haemangioma                             | 0                        | -     |          | 0                             | -     |         | 1                           | 1.96  |         | 0                            | -     |         | 0                                  | -    |         | 0                                | -    |         | 0                                 | -     |         | 0                            | -     |         | 0                          | -     |         | 0                           | -     |         |
|                              | Haemangiosarcoma                        | 0                        | -     | § 0.0419 | 0                             | -     |         | 0                           | -     |         | 0                            | -     |         | 0                                  | -    |         | 0                                | -    |         | 0                                 | -     |         | 0                            | -     |         | 0                          | -     |         | 1                           | 1.96  |         |
| Thymus                       |                                         |                          |       |          |                               |       |         |                             |       |         |                              |       |         |                                    |      |         |                                  |      |         |                                   |       |         |                              |       |         |                            |       |         |                             |       |         |
|                              | Benign Thymoma                          | 0                        | -     |          | 0                             | -     |         | 2                           | 3.92  |         | 0                            | -     |         | 0                                  | -    |         | 0                                | -    |         | 0                                 | -     |         | 1                            | 1.96  |         | 0                          | -     |         | 0                           | -     |         |
| Haemolymphoreticular tissues |                                         |                          |       |          |                               |       |         |                             |       |         |                              |       |         |                                    |      |         |                                  |      |         |                                   |       |         |                              |       |         |                            |       |         |                             |       |         |
|                              | Lymphomas                               | 5                        | 9.8   |          | 4                             | 7.84  |         | 5                           | 9.80  |         | 6                            | 11.76 |         | 0                                  | -    |         | 2                                | 3.92 |         | 4                                 | 7.84  |         | 5                            | 9.80  |         | 5                          | 9.80  |         | 5                           | 9.80  |         |
|                              | Leukaemias                              | 0                        | -     | # 0.0071 | 1                             | 1.96  |         | 1                           | 1.96  |         | 1                            | 1.96  |         | 0                                  | -    |         | 0                                | -    |         | 2                                 | 3.92  |         | 1                            | 1.96  |         | 1                          | 1.96  |         | 3                           | 5.88  |         |
|                              | Histiocytic sarcoma                     | 2                        | 3.9   | § 0.0313 | 1                             | 1.96  |         | 0                           | -     |         | 1                            | 1.96  |         | 0                                  | -    |         | 0                                | -    |         | 1                                 | 1.96  |         | 0                            | -     |         | 0                          | -     |         | 1                           | 1.96  |         |
|                              | All types of hemolymphoreticular tumors | 7                        | 13.73 |          | 6                             | 11.76 |         | 6                           | 11.76 |         | 8                            | 15.69 |         | 0                                  | -    |         | 2                                | 3.92 |         | 7                                 | 13.73 |         | 6                            | 11.76 |         | 6                          | 11.76 |         | 9                           | 17.65 |         |

<sup>a</sup> Between brackets the number of tumours (one animal can bear more than one tumour)

\* Statistically significant increased trend in incidence of tumors among groups treated with Glyphosate and control (Cochran-Armitage trend test)

# Statistically significant increased trend in incidence of tumors among groups treated with Roundup Bioflow and control (Cochran-Armitage trend test)

§ Statistically significant increased trend in incidence of tumors among groups treated with RangerPro and control (Cochran-Armitage trend test)

SUPPLEMENTARY TABLE 2: INCIDENCE RATES OF NEOPLASMS BY ANATOMIC SITE IN FEMALE SD RATS

| Site                              | Histotype                                   | Dose Groups a |       |          |                               |       |         |                             |       |         |                              |       |         |                                    |       |         |                                  |       |         |                                   |       |         |                              |       |          |                            |       |         |                             |       |         |   |   |  |
|-----------------------------------|---------------------------------------------|---------------|-------|----------|-------------------------------|-------|---------|-----------------------------|-------|---------|------------------------------|-------|---------|------------------------------------|-------|---------|----------------------------------|-------|---------|-----------------------------------|-------|---------|------------------------------|-------|----------|----------------------------|-------|---------|-----------------------------|-------|---------|---|---|--|
|                                   |                                             | 0 (control)   |       |          | Glyphosate (0.5 mg/kg bw/day) |       |         | Glyphosate (5 mg/kg bw/day) |       |         | Glyphosate (50 mg/kg bw/day) |       |         | Roundup Bioflow (0.5 mg/kg bw/day) |       |         | Roundup Bioflow (5 mg/kg bw/day) |       |         | Roundup Bioflow (50 mg/kg bw/day) |       |         | RangerPro (0.5 mg/kg bw/day) |       |          | RangerPro (5 mg/kg bw/day) |       |         | RangerPro (50 mg/kg bw/day) |       |         |   |   |  |
|                                   |                                             | No.           | %     | P-value  | No.                           | %     | P-value | No.                         | %     | P-value | No.                          | %     | P-value | No.                                | %     | P-value | No.                              | %     | P-value | No.                               | %     | P-value | No.                          | %     | P-value  | No.                        | %     | P-value | No.                         | %     | P-value |   |   |  |
| Skin                              | Squamous cell papilloma (Acanthoma)         | 0             | 0.0   |          | 0                             | -     |         | 0                           | -     |         | 0                            | -     |         | 0                                  | -     |         | 0                                | -     |         | 0                                 | -     |         | 0                            | -     |          | 1                          | 1.96  |         | 0                           | -     |         | 0 | - |  |
|                                   | Benign Trichoepithelioma                    | 0             | 0.0   | # 0.0419 | 0                             | -     |         | 0                           | -     |         | 0                            | -     |         | 0                                  | -     |         | 0                                | -     |         | 1                                 | 1.96  |         | 0                            | -     |          | 0                          | -     |         | 0                           | -     |         | 0 | - |  |
|                                   | Squamous cell carcinoma                     | 0             | 0.0   |          | 1                             | 1.96  |         | 0                           | -     |         | 0                            | -     |         | 1                                  | 1.96  |         | 0                                | -     |         | 0                                 | -     |         | 0                            | -     |          | 0                          | -     |         | 2                           | 3.92  |         | 0 | - |  |
|                                   | Basal cell carcinoma                        | 0             | 0.0   |          | 0                             | -     |         | 1                           | 1.96  |         | 0                            | -     |         | 0                                  | -     |         | 0                                | -     |         | 0                                 | -     |         | 0                            | -     |          | 0                          | -     |         | 0                           | -     |         | 0 | - |  |
|                                   | Sebaceous carcinoma                         | 0             | 0.0   |          | 0                             | -     |         | 0                           | -     |         | 0                            | -     |         | 0                                  | -     |         | 0                                | -     |         | 0                                 | -     |         | 0                            | -     |          | 0                          | -     |         | 1                           | 1.96  |         | 0 | - |  |
|                                   | Subcutaneous tissue, Fibroma                | 1             | 2.0   |          | 0                             | -     |         | 0                           | -     |         | 0                            | -     |         | 0                                  | -     |         | 0                                | -     |         | 0                                 | -     |         | 0                            | -     |          | 0                          | -     |         | 0                           | -     |         | 0 | - |  |
|                                   | Subcutaneous tissue, Lipoma and fibrolipoma | 1             | 2.0   |          | 0                             | -     |         | 3(4)                        | 5.88  |         | 1                            | 1.96  |         | 1                                  | 1.96  |         | 1                                | 1.96  |         | 2                                 | 3.92  |         | 1                            | 1.96  |          | 3                          | 5.88  |         | 2                           | 3.92  |         |   |   |  |
|                                   | Subcutaneous tissue, Hemangioma             | 0             | 0.0   |          | 0                             | -     |         | 0                           | -     |         | 0                            | -     |         | 0                                  | -     |         | 0                                | -     |         | 0                                 | -     |         | 0                            | -     |          | 1                          | 1.96  |         | 0                           | -     |         |   |   |  |
|                                   | Subcutaneous tissue, Liposarcoma            | 0             | 0.0   | * 0.0419 | 0                             | -     |         | 0                           | -     |         | 1                            | 1.96  |         | 0                                  | -     |         | 0                                | -     |         | 0                                 | -     |         | 0                            | -     |          | 0                          | -     |         | 0                           | -     |         | 0 | - |  |
| Subcutaneous tissue, Fibrosarcoma | 0                                           | 0.0           |       | 0        | -                             |       | 0       | -                           |       | 0       | -                            |       | 0       | -                                  |       | 0       | -                                |       | 0       | -                                 |       | 0       | -                            |       | 0        | -                          |       | 1       | 1.96                        |       | 0       | - |   |  |
| Mammary glands                    | Adenoma, fibroma and fibroadenoma           | 22(31)        | 43.14 |          | 32(44)                        | 62.75 |         | 21(32)                      | 41.18 |         | 29(40)                       | 56.86 |         | 23(36)                             | 45.10 |         | 22(30)                           | 43.14 |         | 27(37)                            | 52.94 |         | 33(46)                       | 64.71 | ° 0.0465 | 28(38)                     | 54.90 |         | 26(33)                      | 50.98 |         |   |   |  |
|                                   | Lipoma and fibrolipoma                      | 0             | -     |          | 3                             | 5.88  |         | 0                           | -     |         | 1                            | 1.96  |         | 1                                  | 1.96  |         | 2                                | 3.92  |         | 0                                 | -     |         | 1                            | 1.96  |          | 1                          | 1.96  |         | 0                           | -     |         |   |   |  |
|                                   | Adenocarcinoma                              | 14(20)        | 27.45 |          | 11(15)                        | 21.57 |         | 16(20)                      | 31.37 |         | 11                           | 21.57 |         | 11                                 | 21.57 |         | 14(18)                           | 27.45 |         | 20(24)                            | 39.22 |         | 14(17)                       | 27.45 |          | 14(21)                     | 27.45 |         | 13(19)                      | 25.49 |         |   |   |  |
|                                   | Fibrosarcoma                                | 0             | -     |          | 0                             | -     |         | 1                           | 1.96  |         | 0                            | -     |         | 0                                  | -     |         | 1                                | 1.96  |         | 0                                 | -     |         | 2                            | 3.92  |          | 0                          | -     |         | 0                           | -     |         |   |   |  |
|                                   | Liposarcoma                                 | 0             | -     |          | 0                             | -     |         | 0                           | -     |         | 0                            | -     |         | 1                                  | 1.96  |         | 0                                | -     |         | 0                                 | -     |         | 0                            | -     |          | 0                          | -     |         | 0                           | -     |         |   |   |  |
| Zymbal gland                      | Carcinoma                                   | 0             | -     |          | 0                             | -     |         | 0                           | -     |         | 0                            | -     |         | 0                                  | -     |         | 0                                | -     |         | 0                                 | -     |         | 0                            | -     |          | 1                          | 1.96  |         | 0                           | -     |         |   |   |  |
|                                   | Olfactory adenoma                           | 0             | -     |          | 0                             | -     |         | 0                           | -     |         | 0                            | -     |         | 0                                  | -     |         | 0                                | -     |         | 0                                 | -     |         | 0                            | -     |          | 1                          | 1.96  |         | 0                           | -     |         |   |   |  |
| Nasal cavity                      | Olfactory adenoma                           | 0             | -     |          | 0                             | -     |         | 0                           | -     |         | 0                            | -     |         | 0                                  | -     |         | 0                                | -     |         | 0                                 | -     |         | 0                            | -     |          | 1                          | 1.96  |         | 0                           | -     |         |   |   |  |
|                                   |                                             | 0             | -     |          | 0                             | -     |         | 0                           | -     |         | 0                            | -     |         | 0                                  | -     |         | 0                                | -     |         | 0                                 | -     |         | 0                            | -     |          | 0                          | -     |         | 0                           | -     |         |   |   |  |
| Lung                              | Leiomyoma                                   | 0             | -     |          | 0                             | -     |         | 0                           | -     |         | 0                            | -     |         | 0                                  | -     |         | 1                                | 1.96  |         | 0                                 | -     |         | 0                            | -     |          | 0                          | -     |         | 0                           | -     |         |   |   |  |
|                                   | Fibrosarcoma                                | 0             | -     | § 0.0419 | 0                             | -     |         | 0                           | -     |         | 0                            | -     |         | 0                                  | -     |         | 0                                | -     |         | 0                                 | -     |         | 0                            | -     |          | 0                          | -     |         | 1                           | 1.96  |         |   |   |  |
| Oral cavity                       | Squamous cell carcinoma                     | 1             | 1.96  |          | 0                             | -     |         | 0                           | -     |         | 0                            | -     |         | 0                                  | -     |         | 1                                | 1.96  |         | 0                                 | -     |         | 0                            | -     |          | 1                          | 1.96  |         | 0                           | -     |         |   |   |  |
|                                   |                                             | 1             | 1.96  |          | 0                             | -     |         | 0                           | -     |         | 0                            | -     |         | 0                                  | -     |         | 1                                | 1.96  |         | 0                                 | -     |         | 0                            | -     |          | 1                          | 1.96  |         | 0                           | -     |         |   |   |  |
| Stomach - Forestomach             | Squamous cell Papilloma (Acanthoma)         | 1             | 1.96  |          | 0                             | -     |         | 0                           | -     |         | 1                            | 1.96  |         | 0                                  | -     |         | 0                                | -     |         | 0                                 | -     |         | 0                            | -     |          | 0                          | -     |         | 0                           | -     |         |   |   |  |
|                                   |                                             | 1             | 1.96  |          | 0                             | -     |         | 0                           | -     |         | 1                            | 1.96  |         | 0                                  | -     |         | 0                                | -     |         | 0                                 | -     |         | 0                            | -     |          | 0                          | -     |         | 0                           | -     |         |   |   |  |
| Intestine                         | Adenomatous polyp                           | 1             | 1.96  |          | 0                             | -     |         | 0                           | -     |         | 0                            | -     |         | 0                                  | -     |         | 0                                | -     |         | 0                                 | -     |         | 0                            | -     |          | 0                          | -     |         | 0                           | -     |         |   |   |  |
|                                   | Leiomyoma                                   | 0             | -     |          | 0                             | -     |         | 1                           | 1.96  |         | 0                            | -     |         | 0                                  | -     |         | 0                                | -     |         | 0                                 | -     |         | 0                            | -     |          | 0                          | -     |         | 0                           | -     |         |   |   |  |
|                                   | Adenocarcinoma                              | 0             | -     |          | 0                             | -     |         | 0                           | -     |         | 0                            | -     |         | 1                                  | 1.96  |         | 0                                | -     |         | 0                                 | -     |         | 0                            | -     |          | 0                          | -     |         | 0                           | -     |         |   |   |  |
| Liver                             | Hepatocellular adenoma                      | 0             | -     |          | 0                             | -     |         | 0                           | -     |         | 0                            | -     |         | 0                                  | -     |         | 0                                | -     |         | 0                                 | -     |         | 0                            | -     |          | 0                          | -     |         | 0                           | -     |         |   |   |  |
|                                   | Hemangiosarcoma                             | 1             | 1.96  |          | 0                             | -     |         | 0                           | -     |         | 0                            | -     |         | 0                                  | -     |         | 0                                | -     |         | 0                                 | -     |         | 0                            | -     |          | 0                          | -     |         |                             |       |         |   |   |  |
| Pancreas                          | Exocrine adenoma                            | 0             | -     |          | 0                             | -     |         | 1                           | 1.96  |         | 0                            | -     |         | 0                                  | -     |         | 1                                | 1.96  |         | 1                                 | 1.96  |         | 0                            | -     |          | 0                          | -     |         | 0                           | -     |         |   |   |  |
|                                   | Exocrine carcinoma                          | 0             | -     |          | 0                             | -     |         | 0                           | -     |         | 0                            | -     |         | 0                                  | -     |         | 0                                | -     |         | 0                                 | -     |         | 0                            | -     |          | 0                          | -     |         | 0                           | -     |         |   |   |  |
| Ovary                             | Fibroma                                     | 0             | -     | * 0.0419 | 0                             | -     |         | 0                           | -     |         | 1                            | 1.96  |         | 0                                  | -     |         | 0                                | -     |         | 0                                 | -     |         | 0                            | -     |          | 0                          | -     |         | 0                           | -     |         |   |   |  |
|                                   | Leiomyoma                                   | 0             | -     |          | 1                             | 1.96  |         | 0                           | -     |         | 0                            | -     |         | 0                                  | -     |         | 0                                | -     |         | 0                                 | -     |         | 0                            | -     |          | 0                          | -     |         | 0                           | -     |         |   |   |  |
|                                   | Adenocarcinoma                              | 1(2)          | 1.96  |          | 0                             | -     |         | 0                           | -     |         | 0                            | -     |         | 1                                  | 1.96  |         | 0                                | -     |         | 0                                 | -     |         | 0                            | -     |          | 1                          | 1.96  |         | 0                           | -     |         |   |   |  |
|                                   | Malignant tumor granulosa cell              | 0             | -     | # 0.0419 | 1                             | 1.96  |         | 0                           | -     |         | 0                            | -     |         | 0                                  | -     |         | 0                                | -     |         | 1                                 | 1.96  |         | 0                            | -     |          | 0                          | -     |         | 0                           | -     |         |   |   |  |
| Uterus                            | Polyp (glandular or stromal)                | 11            | 21.57 |          | 4                             | 7.84  |         | 7                           | 13.73 |         | 8                            | 15.69 |         | 11                                 | 21.57 |         | 5                                | 9.80  |         | 3                                 | 5.88  |         | 6                            | 11.76 |          | 9                          | 17.65 |         | 2                           | 3.92  |         |   |   |  |
|                                   | Benign Schwannoma                           | 0             | -     | * 0.0419 | 0                             | -     |         | 0                           | -     |         | 1                            | 1.96  |         | 0                                  | -     |         | 0                                | -     |         | 0                                 | -     |         | 0                            | -     |          | 0                          | -     |         | 0                           | -     |         |   |   |  |
|                                   | Adenocarcinoma                              | 0             | -     |          | 0                             | -     |         | 0                           | -     |         | 0                            | -     |         | 1                                  | 1.96  |         | 0                                | -     |         | 1                                 | 1.96  |         | 0                            | -     |          | 1                          | 1.96  |         | 0                           | -     |         |   |   |  |
|                                   | Leiomyosarcoma                              | 1             | 1.96  |          | 0                             | -     |         | 0                           | -     |         | 0                            | -     |         | 0                                  | -     |         | 0                                | -     |         | 0                                 | -     |         | 2                            | 3.92  |          | 1                          | 1.96  |         | 0                           | -     |         |   |   |  |
|                                   | Malignant Schwannoma                        | 0             | -     |          | 1                             | 1.96  |         | 2                           | 3.92  |         | 2                            | 3.92  |         | 0                                  | -     |         | 1                                | 1.96  |         | 0                                 | -     |         | 0                            | -     |          | 1                          | 1.96  |         | 1                           | 1.96  |         |   |   |  |
|                                   | Hemangiosarcoma                             | 0             | -     | § 0.0419 | 0                             | -     |         | 0                           | -     |         | 0                            | -     |         | 0                                  | -     |         | 0                                | -     |         | 0                                 | -     |         | 0                            | -     |          | 0                          | -     |         | 1                           | 1.96  |         |   |   |  |
|                                   | Squamous cell carcinoma                     | 0             | -     |          | 1                             | 1.96  |         | 0                           | -     |         | 0                            | -     |         | 0                                  | -     |         | 0                                | -     |         | 0                                 | -     |         | 0                            | -     |          | 0                          | -     |         | 0                           | -     |         |   |   |  |
|                                   | Stromal sarcoma                             | 0             | -     |          | 0                             | -     |         | 0                           | -     |         | 0                            | -     |         | 0                                  | -     |         | 0                                | -     |         | 0                                 | -     |         | 1                            | 1.96  |          | 1                          | 1.96  |         | 0                           | -     |         |   |   |  |
| Vagina                            | Polyp                                       | 0             | -     |          | 1                             | 1.96  |         | 0                           | -     |         | 0                            | -     |         | 1                                  | 1.96  |         | 0                                | -     |         | 0                                 | -     |         | 0                            | -     |          | 0                          | -     |         | 0                           | -     |         |   |   |  |
|                                   | Benign granular cell tumor                  | 1             | 1.96  |          | 0                             | -     |         | 0                           | -     |         | 0                            | -     |         | 0                                  | -     |         | 1                                | 1.96  |         | 0                                 | -     |         | 0                            | -     |          | 0                          | -     |         | 0                           | -     |         |   |   |  |
|                                   | Fibroma                                     | 0             | -     |          | 0                             | -     |         | 1                           | 1.96  |         | 0                            | -     |         | 0                                  | -     |         | 0                                | -     |         | 0                                 | -     |         | 0                            | -     |          | 0                          | -     |         | 0                           | -     |         |   |   |  |

SUPPLEMENTARY TABLE 2: INCIDENCE RATES OF NEOPLASMS BY ANATOMIC SITE IN FEMALE SD RATS

| Site                         | Histotype                               | Dose Groups a |       |          |                               |       |         |                             |       |         |                              |       |         |                                    |       |         |                                  |       |         |                                   |       |         |                              |       |         |                            |       |         |                             |       |         |   |      |  |  |  |
|------------------------------|-----------------------------------------|---------------|-------|----------|-------------------------------|-------|---------|-----------------------------|-------|---------|------------------------------|-------|---------|------------------------------------|-------|---------|----------------------------------|-------|---------|-----------------------------------|-------|---------|------------------------------|-------|---------|----------------------------|-------|---------|-----------------------------|-------|---------|---|------|--|--|--|
|                              |                                         | 0 (control)   |       |          | Glyphosate (0.5 mg/kg bw/day) |       |         | Glyphosate (5 mg/kg bw/day) |       |         | Glyphosate (50 mg/kg bw/day) |       |         | Roundup Bioflow (0.5 mg/kg bw/day) |       |         | Roundup Bioflow (5 mg/kg bw/day) |       |         | Roundup Bioflow (50 mg/kg bw/day) |       |         | RangerPro (0.5 mg/kg bw/day) |       |         | RangerPro (5 mg/kg bw/day) |       |         | RangerPro (50 mg/kg bw/day) |       |         |   |      |  |  |  |
|                              |                                         | No.           | %     | P-value  | No.                           | %     | P-value | No.                         | %     | P-value | No.                          | %     | P-value | No.                                | %     | P-value | No.                              | %     | P-value | No.                               | %     | P-value | No.                          | %     | P-value | No.                        | %     | P-value | No.                         | %     | P-value |   |      |  |  |  |
| Clitoral gland               | Adenoma                                 | 0             | -     |          | 0                             | -     |         | 0                           | -     |         | 0                            | -     |         | 0                                  | -     |         | 0                                | -     |         | 0                                 | -     |         | 0                            | -     |         | 1                          | 1.96  |         | 0                           | -     |         | 0 | -    |  |  |  |
| Pituitary gland              | Adenoma                                 | 20            | 39.22 |          | 22                            | 43.14 |         | 18                          | 35.29 |         | 20                           | 39.22 |         | 20                                 | 39.22 |         | 21                               | 41.18 |         | 23                                | 45.10 |         | 23                           | 45.10 |         | 18                         | 35.29 |         | 17                          | 33.33 |         |   |      |  |  |  |
|                              | Adenocarcinoma                          | 2             | 3.92  |          | 0                             | -     |         | 0                           | -     |         | 2                            | 3.92  |         | 1                                  | 1.96  |         | 0                                | -     |         | 1                                 | 1.96  |         | 1                            | 1.96  |         | 1                          | 1.96  |         | 3                           | 5.88  |         |   |      |  |  |  |
| Thyroid gland                | Follicular adenoma                      | 0             | -     |          | 0                             | -     |         | 0                           | -     |         | 0                            | -     |         | 1                                  | 1.96  |         | 1                                | 1.96  |         | 2                                 | 3.92  |         | 0                            | -     |         | 0                          | -     |         | 0                           | -     |         | 0 | -    |  |  |  |
|                              | C-cell adenoma                          | 1             | 1.96  |          | 3                             | 5.88  |         | 0                           | -     |         | 0                            | -     |         | 2                                  | 3.92  |         | 0                                | -     |         | 2                                 | 3.92  |         | 2                            | 3.92  |         | 2                          | 3.92  |         | 0                           | -     |         | 0 | -    |  |  |  |
|                              | Follicular adenocarcinoma               | 0             | -     |          | 0                             | -     |         | 0                           | -     |         | 0                            | -     |         | 0                                  | -     |         | 0                                | -     |         | 0                                 | -     |         | 0                            | -     |         | 0                          | -     |         | 0                           | -     |         | 0 | -    |  |  |  |
|                              | C-cell carcinoma                        | 0             | -     | § 0.0419 | 2                             | 3.92  |         | 1                           | 1.96  |         | 1                            | 1.96  |         | 0                                  | -     |         | 1                                | 1.96  |         | 0                                 | -     |         | 0                            | -     |         | 0                          | -     |         | 0                           | -     |         | 1 | 1.96 |  |  |  |
| Adrenal glands               | Cortical adenoma                        | 2             | 3.92  |          | 1                             | 1.96  |         | 1                           | 1.96  |         | 2                            | 3.92  |         | 3                                  | 5.88  |         | 0                                | -     |         | 2                                 | 3.92  |         | 3                            | 5.88  |         | 1                          | 1.96  |         | 1                           | 1.96  |         | 1 | 1.96 |  |  |  |
|                              | Pheochromocytoma                        | 4             | 7.84  |          | 3                             | 5.88  |         | 3                           | 5.88  |         | 3                            | 5.88  |         | 0                                  | -     |         | 3                                | 5.88  |         | 4(5)                              | 7.84  |         | 1                            | 1.96  |         | 1                          | 1.96  |         | 4(5)                        | 7.84  |         |   |      |  |  |  |
|                              | Complex pheochromocytoma                | 0             | -     |          | 0                             | -     |         | 0                           | -     |         | 0                            | -     |         | 0                                  | -     |         | 1                                | 1.96  |         | 0                                 | -     |         | 0                            | -     |         | 0                          | -     |         | 0                           | -     |         | 0 | -    |  |  |  |
|                              | Cortical adenocarcinoma                 | 0             | -     |          | 0                             | -     |         | 0                           | -     |         | 0                            | -     |         | 1                                  | 1.96  |         | 0                                | -     |         | 2                                 | 3.92  |         | 0                            | -     |         | 2                          | 3.92  |         | 0                           | -     |         | 0 | -    |  |  |  |
|                              | Pheochromoblastoma                      | 1             | 1.96  |          | 0                             | -     |         | 0                           | -     |         | 1(2)                         | 1.96  |         | 1                                  | 1.96  |         | 1                                | 1.96  |         | 1                                 | 1.96  |         | 0                            | -     |         | 0                          | -     |         | 0                           | -     |         | 0 | -    |  |  |  |
| Endocrine Pancreas           | Islet cell adenoma                      | 0             | -     |          | 1                             | 2.0   |         | 0                           | -     |         | 1                            | 1.96  |         | 0                                  | -     |         | 1                                | 1.96  |         | 1                                 | 1.96  |         | 2                            | 3.92  |         | 1                          | 1.96  |         | 2                           | 3.92  |         |   |      |  |  |  |
|                              | Islet cell carcinoma                    | 1             | 1.96  |          | 0                             | -     |         | 0                           | -     |         | 0                            | -     |         | 0                                  | -     |         | 0                                | -     |         | 0                                 | -     |         | 0                            | -     |         | 0                          | -     |         | 0                           | -     |         | 0 | -    |  |  |  |
| Central nervous system       | - Brain                                 |               |       |          |                               |       |         |                             |       |         |                              |       |         |                                    |       |         |                                  |       |         |                                   |       |         |                              |       |         |                            |       |         |                             |       |         |   |      |  |  |  |
|                              | Oligodendroglioma malignant             | 0             | -     |          | 0                             | -     |         | 0                           | -     |         | 0                            | -     |         | 0                                  | -     |         | 0                                | -     |         | 0                                 | -     |         | 0                            | -     |         | 0                          | -     |         | 0                           | -     |         | 0 | -    |  |  |  |
|                              | Astrocytoma malignant                   | 0             | -     |          | 0                             | -     |         | 0                           | -     |         | 0                            | -     |         | 0                                  | -     |         | 0                                | -     |         | 0                                 | -     |         | 0                            | -     |         | 1                          | 1.96  |         | 1                           | 1.96  |         |   |      |  |  |  |
| Central nervous system       | - Meninges                              |               |       |          |                               |       |         |                             |       |         |                              |       |         |                                    |       |         |                                  |       |         |                                   |       |         |                              |       |         |                            |       |         |                             |       |         |   |      |  |  |  |
|                              | Benign granular cell tumour             | 1             | 1.96  |          | 0                             | -     |         | 0                           | -     |         | 0                            | -     |         | 0                                  | -     |         | 1                                | 1.96  |         | 0                                 | -     |         | 0                            | -     |         | 0                          | -     |         | 0                           | -     |         | 0 | -    |  |  |  |
|                              | Malignant granular cell tumor           | 1             | 1.96  |          | 0                             | -     |         | 0                           | -     |         | 0                            | -     |         | 0                                  | -     |         | 0                                | -     |         | 1                                 | 1.96  |         | 0                            | -     |         | 0                          | -     |         | 0                           | -     |         | 1 | 1.96 |  |  |  |
| Peripheral nervous system    | - Others peripheral nerves              |               |       |          |                               |       |         |                             |       |         |                              |       |         |                                    |       |         |                                  |       |         |                                   |       |         |                              |       |         |                            |       |         |                             |       |         |   |      |  |  |  |
|                              | Benign Paraganglioma                    | 0             | -     |          | 1                             | 1.96  |         | 0                           | -     |         | 0                            | -     |         | 0                                  | -     |         | 0                                | -     |         | 0                                 | -     |         | 0                            | -     |         | 0                          | -     |         | 0                           | -     |         | 0 | -    |  |  |  |
|                              | Malignant Schwannoma                    | 0             | -     |          | 1                             | 1.96  |         | 0                           | -     |         | 0                            | -     |         | 0                                  | -     |         | 0                                | -     |         | 0                                 | -     |         | 0                            | -     |         | 0                          | -     |         | 0                           | -     |         | 0 | -    |  |  |  |
| Bones                        | - Head                                  |               |       |          |                               |       |         |                             |       |         |                              |       |         |                                    |       |         |                                  |       |         |                                   |       |         |                              |       |         |                            |       |         |                             |       |         |   |      |  |  |  |
|                              | Osteoma                                 | 1             | 1.96  |          | 1                             | 1.96  |         | 0.0                         | -     |         | 0.0                          | -     |         | 0                                  | -     |         | 0                                | -     |         | 0                                 | -     |         | 0                            | -     |         | 0                          | -     |         | 0                           | -     |         | 0 | -    |  |  |  |
|                              | Osteosarcoma                            | 0             | -     | # 0.0419 | 0                             | -     |         | 0.0                         | -     |         | 0.0                          | -     |         | 0                                  | -     |         | 0                                | -     |         | 1                                 | 1.96  |         | 0                            | -     |         | 0                          | -     |         | 0                           | -     |         | 0 | -    |  |  |  |
|                              | - Other                                 |               |       |          |                               |       |         |                             |       |         |                              |       |         |                                    |       |         |                                  |       |         |                                   |       |         |                              |       |         |                            |       |         |                             |       |         |   |      |  |  |  |
|                              | Osteosarcoma                            | 0             | -     |          | 1                             | 1.96  |         | 0.0                         | -     |         | 0.0                          | -     |         | 0                                  | -     |         | 0                                | -     |         | 0                                 | -     |         | 0                            | -     |         | 0                          | -     |         | 0                           | -     |         | 0 | -    |  |  |  |
| Soft tissues                 | Fibroma                                 | 0             | -     |          | 0                             | -     |         | 0.0                         | -     |         | 0.0                          | -     |         | 1                                  | 1.96  |         | 0                                | -     |         | 0                                 | -     |         | 0                            | -     |         | 0                          | -     |         | 0                           | -     |         | 0 | -    |  |  |  |
|                              | Lipoma                                  | 1             | 1.96  |          | 0                             | -     |         | 0.0                         | -     |         | 0.0                          | -     |         | 0                                  | -     |         | 0                                | -     |         | 0                                 | -     |         | 1                            | 1.96  |         | 0                          | -     |         | 0                           | -     |         | 0 | -    |  |  |  |
|                              | Hemangiosarcoma                         | 0             | -     |          | 0                             | -     |         | 0.0                         | -     |         | 0.0                          | -     |         | 1                                  | 1.96  |         | 0                                | -     |         | 0                                 | -     |         | 0                            | -     |         | 0                          | -     |         | 0                           | -     |         | 0 | -    |  |  |  |
| Spleen                       | Hemangioma                              | 0             | -     |          | 0                             | -     |         | 0.0                         | -     |         | 0.0                          | -     |         | 0                                  | -     |         | 1                                | 1.96  |         | 0                                 | -     |         | 0                            | -     |         | 0                          | -     |         | 0                           | -     |         | 0 | -    |  |  |  |
| Thymus                       | Benign thymoma                          | 2             | 3.92  |          | 0                             | -     |         | 0.0                         | -     |         | 1.0                          | 1.96  |         | 0                                  | -     |         | 0                                | -     |         | 0                                 | -     |         | 0                            | -     |         | 0                          | -     |         | 0                           | -     |         | 1 | 1.96 |  |  |  |
| Lymph nodes                  | Fibroma                                 | 0             | -     |          | 1                             | 1.96  |         | 0                           | -     |         | 0.0                          | -     |         | 0                                  | -     |         | 0                                | -     |         | 0                                 | -     |         | 0                            | -     |         | 0                          | -     |         | 0                           | -     |         | 0 | -    |  |  |  |
|                              | Hemangioma                              | 0             | -     |          | 1                             | 1.96  |         | 0                           | -     |         | 0.0                          | -     |         | 0                                  | -     |         | 0                                | -     |         | 0                                 | -     |         | 0                            | -     |         | 0                          | -     |         | 0                           | -     |         | 0 | -    |  |  |  |
| Haemolymphoreticular tissues | Lymphomas                               | 3             | 5.90  |          | 1                             | 1.96  |         | 5                           | 9.80  |         | 3                            | 5.88  |         | 0                                  | -     |         | 1                                | 1.96  |         | 2                                 | 3.92  |         | 3                            | 5.88  |         | 3                          | 5.88  |         | 2                           | 3.92  |         |   |      |  |  |  |
|                              | Leukaemias                              | 0             | -     | # 0.0419 | 1                             | 1.96  |         | 0                           | -     |         | 1                            | 1.96  |         | 0                                  | -     |         | 0                                | -     |         | 1                                 | 1.96  |         | 0                            | -     |         | 1                          | 1.96  |         | 1                           | 1.96  |         |   |      |  |  |  |
|                              | Histiocytic sarcoma                     | 0             | -     |          | 0                             | -     |         | 0                           | -     |         | 0                            | -     |         | 0                                  | -     |         | 0                                | -     |         | 0                                 | -     |         | 2                            | 3.92  |         | 0                          | -     |         | 0                           | -     |         | 0 | -    |  |  |  |
|                              | All types of hemolymphoreticular tumors | 3             | 5.88  |          | 2                             | 3.92  |         | 5                           | 9.80  |         | 4                            | 7.84  |         | 0                                  | -     |         | 1                                | 1.96  |         | 3                                 | 5.88  |         | 5                            | 9.80  |         | 4                          | 7.84  |         | 3                           | 5.88  |         |   |      |  |  |  |

<sup>a</sup> Between brackets the number of tumours (one animal can bear more than one tumour)

\* Statistically significant increased trend in incidence of tumors among groups treated with Glyphosate and control (Cochran-Armitage trend test)

# Statistically significant increased trend in incidence of tumors among groups treated with Roundup Bioflow and control (Cochran-Armitage trend test)

§ Statistically significant increased trend in incidence of tumors among groups treated with RangerPro and control (Cochran-Armitage trend test)

° Statistically significant with Fisher exact test

SUPPLEMENTARY TABLE 3: INCIDENCE RATES OF LYMPHOMAS BY HISTOTYPE IN MALE SD RATS

| Site                                     | Histotype               | Dose groups    |      |                                  |      |                                |      |                                 |       |                                       |   |                                     |      |                                      |      |                                 |      |                               |      |                                |      |
|------------------------------------------|-------------------------|----------------|------|----------------------------------|------|--------------------------------|------|---------------------------------|-------|---------------------------------------|---|-------------------------------------|------|--------------------------------------|------|---------------------------------|------|-------------------------------|------|--------------------------------|------|
|                                          |                         | 0<br>(control) |      | Glyphosate<br>(0.5 mg/kg bw/day) |      | Glyphosate<br>(5 mg/kg bw/day) |      | Glyphosate<br>(50 mg/kg bw/day) |       | Roundup Bioflow<br>(0.5 mg/kg bw/day) |   | Roundup Bioflow<br>(5 mg/kg bw/day) |      | Roundup Bioflow<br>(50 mg/kg bw/day) |      | RangerPro<br>(0.5 mg/kg bw/day) |      | RangerPro<br>(5 mg/kg bw/day) |      | RangerPro<br>(50 mg/kg bw/day) |      |
|                                          |                         | No.            | %    | No.                              | %    | No.                            | %    | No.                             | %     | No.                                   | % | No.                                 | %    | No.                                  | %    | No.                             | %    | No.                           | %    | No.                            | %    |
| Haemolymphoreticular tissues (Lymphomas) |                         |                |      |                                  |      |                                |      |                                 |       |                                       |   |                                     |      |                                      |      |                                 |      |                               |      |                                |      |
|                                          | All type of Lymphomas   | 5              | 9.80 | 4                                | 7.84 | 5                              | 9.80 | 6                               | 11.76 | 0                                     | - | 2                                   | 3.92 | 4                                    | 7.84 | 5                               | 9.80 | 5                             | 9.80 | 5                              | 9.80 |
|                                          | Lymphocytic lymphomas   | 0              | -    | 0                                | -    | 0                              | -    | 0                               | -     | 0                                     | - | 0                                   | -    | 0                                    | -    | 0                               | -    | 0                             | -    | 0                              | -    |
|                                          | Lymphoblastic lymphomas | 0              | -    | 0                                | -    | 2                              | 1.96 | 0                               | -     | 0                                     | - | 0                                   | -    | 1                                    | 1.96 | 1                               | 1.96 | 1                             | 1.96 | 1                              | 1.96 |
|                                          | Immunoblastic lymphomas | 5              | 9.80 | 4                                | 7.84 | 5                              | 9.80 | 6                               | 11.76 | 0                                     | - | 2                                   | 3.92 | 3                                    | 5.88 | 4                               | 7.84 | 4                             | 7.84 | 4                              | 7.84 |

SUPPLEMENTARY TABLE 4: INCIDENCE RATES OF LYMPHOMAS BY HISTOTYPE IN FEMALE SD RATS

| Site                                     | Histotype               | Dose groups    |      |     |     |      |     |                                  |     |      |     |   |     |                                |     |      |     |      |     |                                 |     |      |     |   |     |                                       |     |                                     |     |                                      |     |                                 |   |                               |   |                                |   |   |   |      |
|------------------------------------------|-------------------------|----------------|------|-----|-----|------|-----|----------------------------------|-----|------|-----|---|-----|--------------------------------|-----|------|-----|------|-----|---------------------------------|-----|------|-----|---|-----|---------------------------------------|-----|-------------------------------------|-----|--------------------------------------|-----|---------------------------------|---|-------------------------------|---|--------------------------------|---|---|---|------|
|                                          |                         | 0<br>(control) |      |     |     |      |     | Glyphosate<br>(0.5 mg/kg bw/day) |     |      |     |   |     | Glyphosate<br>(5 mg/kg bw/day) |     |      |     |      |     | Glyphosate<br>(50 mg/kg bw/day) |     |      |     |   |     | Roundup Bioflow<br>(0.5 mg/kg bw/day) |     | Roundup Bioflow<br>(5 mg/kg bw/day) |     | Roundup Bioflow<br>(50 mg/kg bw/day) |     | RangerPro<br>(0.5 mg/kg bw/day) |   | RangerPro<br>(5 mg/kg bw/day) |   | RangerPro<br>(50 mg/kg bw/day) |   |   |   |      |
|                                          |                         | No.            | %    | val | No. | %    | No. | %                                | No. | %    | No. | % | No. | %                              | No. | %    | No. | %    | No. | %                               | No. | %    | No. | % | No. | %                                     | No. | %                                   | No. | %                                    | No. | %                               |   |                               |   |                                |   |   |   |      |
| Haemolymphoreticular tissues (Lymphomas) | All type of Lymphomas   | 3              | 5.90 |     | 1   | 1.96 | 5   | 9.80                             | 3   | 5.88 | 0   | - | 1   | 1.96                           | 2   | 3.92 | 3   | 5.88 | 3   | 5.88                            | 2   | 3.92 | 0   | - | 0   | -                                     | 1   | 1.96                                | 0   | -                                    | 2   | 3.92                            | 0 | -                             | 1 | 1.96                           | 0 | - | 1 | 1.96 |
|                                          | Lymphocytic lymphomas   | 0              | -    |     | 0   | -    | 0   | -                                | 0   | -    | 0   | - | 0   | -                              | 0   | -    | 0   | -    | 0   | -                               | 2   | 3.92 | 0   | - | 0   | -                                     | 1   | 1.96                                | 0   | -                                    | 0   | -                               | 0 | -                             | 0 | -                              | 0 | - | 0 | -    |
|                                          | Lymphoblastic lymphomas | 1              | 1.96 |     | 0   | -    | 0   | -                                | 0   | -    | 0   | - | 1   | 1.96                           | 1   | 1.96 | 0   | -    | 0   | -                               | 0   | -    | 0   | - | 0   | -                                     | 0   | -                                   | 0   | -                                    | 0   | -                               | 0 | -                             | 0 | -                              | 0 | - | 0 | -    |
|                                          | Immunoblastic lymphomas | 2              | 3.92 |     | 1   | 1.96 | 5   | 9.80                             | 3   | 5.88 | 0   | - | 0   | -                              | 1   | 2.0  | 3   | 5.88 | 1   | 2.0                             | 1   | 1.96 | 0   | - | 0   | -                                     | 0   | -                                   | 0   | -                                    | 0   | -                               | 0 | -                             | 0 | -                              | 0 | - | 0 | -    |
